# Supplementary material for: The Predictors of Target Lesion Revascularization and Rate of In-Stent Restenosis in the Second-Generation Drug-Eluting Stent Era
Source: PubMed Central journal article supplement (PMC6739790; doi:10.1155/2019/3270132), 2019-07-01

## **Supplementary Appendix**

### **The predictors of target lesion revascularization in second-generation drug-eluting stent era**

Chengbin Zheng, Jeehoon Kang et al.

- 1. Supplementary Tables**
- 2. Supplementary Figure**

**Supplementary Table 1. Baseline demographic and clinical characteristics of the current study population and total parent population.**

|                                  | <b>Current study<br/>population (n=394)</b> | <b>Total parent<br/>population (n=3365)</b> | <b>P value</b> |
|----------------------------------|---------------------------------------------|---------------------------------------------|----------------|
| <b>Age (years old)</b>           | 65.5±10.4                                   | 65.5±10.4                                   | 1.000          |
| <b>BMI (kg/m<sup>2</sup>)</b>    | 24.7±2.9                                    | 24.5±3.1                                    | 0.223          |
| <b>Male sex, n (%)</b>           | 289 (73.4)                                  | 2383 (70.8)                                 | 0.668          |
| <b>Previous PCI, n (%)</b>       | 48 (12.2)                                   | 612 (18.2)                                  | 0.011          |
| <b>Diabetes mellitus, n (%)</b>  | 133 (33.8)                                  | 1322 (39.3)                                 | 0.150          |
| <b>Hypertension, n (%)</b>       | 275 (69.8)                                  | 2217 (65.9)                                 | 0.488          |
| <b>Dyslipidemia, n (%)</b>       | 248 (62.9)                                  | 2294 (68.2)                                 | 0.350          |
| <b>CRF, n (%)</b>                | 162 (41.1)                                  | 1323 (39.3)                                 | 0.651          |
| <b>Current Smoking, n (%)</b>    | 104 (26.4)                                  | 778 (23.1)                                  | 0.258          |
| <b>FHx of CAD, n (%)</b>         | 52 (13.2)                                   | 398 (11.8)                                  | 0.484          |
| <b>LV ejection fraction, (%)</b> | 60.0±8.6                                    | 57.4±10.4                                   | <0.001         |
| <b>Clinical diagnosis</b>        |                                             |                                             | 0.002          |
| <b>- Silent ischemia, n (%)</b>  | 21 (5.3)                                    | 169 (5.0)                                   |                |
| <b>- Stable angina, n (%)</b>    | 232 (58.9)                                  | 1630 (48.4)                                 |                |
| <b>- Unstable angina, n (%)</b>  | 78 (19.8)                                   | 809 (24.0)                                  |                |
| <b>- STEMI, n (%)</b>            | 24 (6.1)                                    | 362 (10.8)                                  |                |

|                           |            |             |       |
|---------------------------|------------|-------------|-------|
| - NSTEMI, n (%)           | 39 (9.9)   | 391 (11.6)  | 0.363 |
| <b>Vessel disease</b>     |            |             |       |
| - 1 Vessel disease, n (%) | 108 (27.4) | 1051 (31.2) |       |
| - 2 Vessel disease, n (%) | 149 (37.8) | 1143 (34.0) |       |
| - 3 Vessel disease, n (%) | 137 (34.8) | 1171 (34.8) |       |

BMI, body mass index; PCI, percutaneous coronary intervention; CRF, chronic renal failure; FHx, family history; CAD, coronary artery disease; LV, left ventricle; STEMI, ST-elevation myocardial infarction; NSTEMI, non ST-elevation myocardial infarction.

**Supplementary Table 2. Baseline patients and lesions characteristics**

| <b>Patient character (N=394)</b> | <b>Value</b> |
|----------------------------------|--------------|
| <b>Age (years old)</b>           | 65.5±10.4    |
| <b>BMI (kg/m<sup>2</sup>)</b>    | 24.7±2.9     |
| <b>Male sex, n (%)</b>           | 289 (73.4)   |
| <b>Previous PCI, n (%)</b>       | 48 (12.2)    |
| <b>Previous CABG, n (%)</b>      | 7 (1.8)      |
| <b>Previous MI, n (%)</b>        | 29 (7.4)     |
| <b>Previous CHF, n (%)</b>       | 3 (0.8)      |
| <b>Diabetes mellitus, n (%)</b>  | 133 (33.8)   |
| - No control, n (%)              | 16 (4.1)     |
| - Dietary, n (%)                 | 6 (1.5)      |
| - Oral, n (%)                    | 102 (25.9)   |
| - Insulin, n (%)                 | 20 (5.1)     |

|                                                  |                               |
|--------------------------------------------------|-------------------------------|
| <b>Hypertension, n (%)</b>                       | 275 (69.8)                    |
| <b>CRF, n (%)</b>                                | 162 (41.1)                    |
| <b>Dyslipidemia, n (%)</b>                       | 248 (62.9)                    |
| <b>Smoking, (%)<sup>*</sup></b>                  | 44.7 / 26.4 / 27.9            |
| <b>FHx of CAD, n (%)</b>                         | 52 (13.2)                     |
| <b>LV Ejection fraction, (%)</b>                 | 60.0±8.6                      |
| <b>Clinical diagnosis, (%)<sup>†</sup></b>       | 5.3 / 58.9 / 19.8 / 6.1 / 9.9 |
| <b>Number of Vessel disease, (%)<sup>‡</sup></b> | 27.4 / 37.8 / 34.8            |
| <b><i>Laboratory tests</i></b>                   |                               |
| <b>WBC (10<sup>9</sup>/L)</b>                    | 6.9±2.3                       |
| <b>Hemoglobin (g/dl)</b>                         | 13.5±1.8                      |
| <b>Creatinine(mg/dl)</b>                         | 1.08±0.66                     |
| <b>GFR (ml/min)</b>                              | 69.3±24.8                     |
| <b>CrCl (ml/min)</b>                             | 67.6±23.1                     |
| <b>HbA1c (%)</b>                                 | 6.79±1.21                     |
| <b>Total cholesterol (mg/dl)</b>                 | 158±39                        |
| <b>Triglyceride (mg/dl)</b>                      | 138±84                        |
| <b>LDL (mg/dl)</b>                               | 97±36                         |
| <b>HDL (mg/dl)</b>                               | 42±11                         |
| <b>CRP(mg/dl)</b>                                | 0.40±1.13                     |
| <b><i>Medication at discharge</i></b>            |                               |
| <b>- Aspirin, n (%)</b>                          | 393 (99.7)                    |
| <b>- Clopidogrel, n (%)</b>                      | 393 (99.7)                    |
| <b>- DAPT, n (%)<sup>#</sup></b>                 | 392 (99.5)                    |
| <b>- Beta blocker, n (%)</b>                     | 279 (70.8)                    |
| <b>- Statin, n (%)</b>                           | 376 (95.4)                    |
| <b>- CCB, n (%)</b>                              | 86 (21.8)                     |
| <b>- ACEI, n (%)</b>                             | 101 (25.6)                    |

|                                       |            |
|---------------------------------------|------------|
| - ARB, n (%)                          | 153 (38.8) |
| <b>Medication at first follow-up</b>  |            |
| - Aspirin, n (%)                      | 391 (99.2) |
| - Clopidogrel, n (%)                  | 385 (97.7) |
| - DAPT, n (%) <sup>#</sup>            | 382 (97.0) |
| - Beta blocker, n (%)                 | 294 (74.6) |
| - Statin, n (%)                       | 392 (99.5) |
| - CCB, n (%)                          | 87 (22.1)  |
| - ACEI, n (%)                         | 44 (11.2)  |
| - ARB, n (%)                          | 158 (40.1) |
| <b>Medication at second follow-up</b> |            |
| - Aspirin, n (%)                      | 362 (91.9) |
| - Clopidogrel, n (%)                  | 337 (85.5) |
| - DAPT, n (%) <sup>#</sup>            | 307 (77.9) |
| - Beta blocker, n (%)                 | 281 (71.3) |
| - Statin, n (%)                       | 388 (98.5) |
| - CCB, n (%)                          | 77 (19.5)  |
| - ACEI, n (%)                         | 35 (8.9)   |
| - ARB, n (%)                          | 150 (38.1) |
| <b>Lesion character (N=944)</b>       |            |
| Stent/person (n)                      | 2.4±1.6    |
| Second generation DES (%)             | 100        |
| <b>Stent type</b>                     |            |
| - CoCr-EES (%)                        | 25.8       |
| - ZES (%)                             | 32.8       |
| - BES (%)                             | 17.6       |
| - PtCr-EES (%)                        | 23.7       |
| <b>Lesion type</b>                    |            |
| - A (%)                               | 10.6       |
| - B1 (%)                              | 23.5       |

|                                                     |             |
|-----------------------------------------------------|-------------|
| - B2 (%)                                            | 6.3         |
| - C (%)                                             | 56.5        |
| <b>Type B2/C lesion (%)</b>                         | <b>62.7</b> |
| <b>Treated coronary location</b>                    |             |
| - LM (%)                                            | 8.8         |
| - LAD (%)                                           | 37.7        |
| - Proximal LAD (%)                                  | 22.7        |
| - Mid LAD (%)                                       | 8.7         |
| - Distal LAD (%)                                    | 1.9         |
| - Diagonal 1 (%)                                    | 3.7         |
| - Diagonal 2 (%)                                    | 0.7         |
| - LCX (%)                                           | 24.8        |
| - Proximal LCX (%)                                  | 11.2        |
| - Distal LCX (%)                                    | 8.6         |
| - Ramus (%)                                         | 2.0         |
| - OM1 (%)                                           | 2.6         |
| - OM2 (%)                                           | 0.3         |
| - RCA (%)                                           | 28.5        |
| - Proximal RCA (%)                                  | 17.4        |
| - Mid RCA (%)                                       | 5.0         |
| - Distal RCA (%)                                    | 4.7         |
| - PDA (%)                                           | 0.7         |
| - PL branch (%)                                     | 0.7         |
| - SVG (%)                                           | 0.2         |
| <b>Bifurcation lesion (%)</b>                       | <b>35.3</b> |
| <b>Calcified lesion (moderate &amp; severe) (%)</b> | <b>32.1</b> |
| <b>Tortuous lesion (%)</b>                          | <b>6.9</b>  |
| <b>Angulation lesion (%)</b>                        | <b>6.4</b>  |
| <b>Thrombus in lesion (%)</b>                       | <b>3.1</b>  |
| <b>Ostial lesion (%)</b>                            | <b>19.4</b> |

|                                                                   |           |
|-------------------------------------------------------------------|-----------|
| <b>Ulceration (%)</b>                                             | 0.5       |
| <b>Aneurysm (%)</b>                                               | 1.1       |
| <b>Previously treated lesion (%)</b>                              | 1.7       |
| <b>Stent diameter (mm)</b>                                        | 3.03±0.44 |
| <b>Stent length (mm)</b>                                          | 25.4±6.0  |
| <b>Pre-procedure MLD (mm)</b>                                     | 0.73±0.50 |
| <b>Pre-procedure DS (%)</b>                                       | 74.8±15.7 |
| <b>Reference Vessel Diameter (mm)</b>                             | 2.92±0.52 |
| <b>Lesion length (mm)</b>                                         | 27.7±17.3 |
| <b>Post-procedure MLD (in-stent) (mm)</b>                         | 2.48±0.44 |
| <b>Post-procedure MLD (in-segment) (mm)</b>                       | 2.11±0.52 |
| <b>Post-procedure DS (in-stent) (%)</b>                           | 11.8±8.5  |
| <b>Post-procedure DS (in-segment) (%)</b>                         | 21.5±11.6 |
| <b><i>Restenosis pattern at first angiographic follow-up</i></b>  |           |
| <b>- 0-No Restenosis (%)</b>                                      | 89.1      |
| <b>- 1-Focal articulation or Gap (%)</b>                          | 0.3       |
| <b>- 2-Focal in stent (stent body) (%)</b>                        | 3.1       |
| <b>- 3-Focal in stent (stent proximal edge) (%)</b>               | 2.5       |
| <b>- 4-Focal in stent (stent distal edge) (%)</b>                 | 0.4       |
| <b>- 5-Multiple focal in segment (&lt;5mm from edge) (%)</b>      | 0.8       |
| <b>- 6-Diffuse in stent (%)</b>                                   | 1.3       |
| <b>- 7-Diffuse proliferative (%)</b>                              | 0.1       |
| <b>- 8-Complete stent occlusion (%)</b>                           | 0.8       |
| <b><i>Restenosis pattern at second angiographic follow-up</i></b> |           |
| <b>- 0-No Restenosis (%)</b>                                      | 83.2      |
| <b>- 1-Focal articulation or Gap (%)</b>                          | 0.0       |
| <b>- 2-Focal in stent (stent body) (%)</b>                        | 1.6       |
| <b>- 3-Focal in stent (stent proximal edge) (%)</b>               | 2.0       |
| <b>- 4-Focal in stent (stent distal edge) (%)</b>                 | 1.3       |
| <b>- 5-Multiple focal in segment (&lt;5mm from edge) (%)</b>      | 0.3       |

|                                  |     |
|----------------------------------|-----|
| - 6-Diffuse in stent (%)         | 1.1 |
| - 7-Diffuse proliferative (%)    | 0.2 |
| - 8-Complete stent occlusion (%) | 0.4 |

BMI, body mass index; kg, kilogram; PCI, percutaneous coronary intervention; CABG, coronary artery bypass graft surgery; MI, Myocardial infarction; CHF, Congestive heart failure; CRF, chronic renal failure; FHx, family history; CAD, coronary artery disease; LV, left ventricle; WBC, white blood cell; GFR, glomerular filtration rate; CrCl, creatinine clearance; HbA1c, hemoglobin A1c; LDL, low density lipoprotein cholesterol; HDL, high density lipoprotein cholesterol; CRP, C-reactive protein; DAPT, dual antiplatelet therapy; CCB, calcium channel blockers; ACEI, angiotensin converting enzyme inhibitors; ARB, angiotensin II receptor blockers; DES, drug eluting stent; CoCr-EES, cobalt chromium everolimus-eluting stent; ZES, zotarolimus-eluting stent; BES, Biolimus- eluting stent; PtCr-EES, platinum chromium everolimus-eluting stent; LM, left main; LAD, left anterior descending; LCX, left circumflex; OM, obtuse marginal; RCA, right coronary artery; PDA, posterior descending artery; PL, posterolateral; SVG, saphenous vein graft; MLD, minimal lumen diameter; DS, diameter stenosis.

\* Smoking: Never smoker / Current smoker / Ex-smoker

† Clinical diagnosis: Silent ischemia / Stable angina / Unstable angina / non ST-segment elevation myocardial infarction / ST-segment elevation myocardial infarction

‡ Vessel disease: 1 Vessel disease / 2 Vessel disease / 3 Vessel disease

#DAPT: Combination of aspirin and Clopidogrel.



**Supplementary Table 3. Laboratory findings at the follow-up periods**

|                                  | <b>Baseline</b> | <b>1st follow-up</b> | <b>2nd follow-up</b> |
|----------------------------------|-----------------|----------------------|----------------------|
| <b>WBC (10<sup>9</sup>/L)</b>    | 6.9±2.3         | 6.0±1.5              | 5.9±1.5              |
| <b>Hemoglobin (g/dl)</b>         | 13.5±1.8        | 13.2±1.8             | 13.4±1.6             |
| <b>Creatinine(mg/dl)</b>         | 1.08±0.66       | 1.02±0.70            | 1.07±0.97            |
| <b>Total cholesterol (mg/dl)</b> | 158±39          | 129±27               | 129±25               |
| <b>Triglyceride (mg/dl)</b>      | 138±84          | 115±51               | 113±54               |
| <b>LDL (mg/dl)</b>               | 97±36           | 66±22                | 65±20                |
| <b>HDL (mg/dl)</b>               | 42±11           | 44±12                | 47±12                |
| <b>CRP(mg/L)</b>                 | 0.40±1.13       | 0.14±0.43            | 0.23±0.85            |

WBC, white blood cell; LDL, low density lipoprotein cholesterol; HDL, high density lipoprotein cholesterol; CRP, C-reactive protein

**Supplementary Table 4. Clinical events during the follow-up period**

|                                  | <b>First follow-up<br/>(N=394)</b> | <b>Second follow-up<br/>(N=394)</b> |
|----------------------------------|------------------------------------|-------------------------------------|
| <b>MACE, n (%)</b>               | 40 (10.2)                          | 59 (15.0)                           |
| <b>- All death, n (%)</b>        | 0 (0)                              | 1 (0.3)                             |
| <b>- All MI, n (%)</b>           | 2 (0.5)                            | 3 (0.8)                             |
| <b>- TLR, n (%)</b>              | 40 (10.2)                          | 59 (15.0)                           |
| <b>- Stent thrombosis, n (%)</b> | 0 (0)                              | 0 (0)                               |

MACE, major adverse cardiac events; MI, myocardial infarction; TLR, target lesion revascularization.

**Supplementary Table 5. Ischemic driven and angiographic driven TLR**

|                                       | <b>Early TLR (+)</b><br><b>(N=58)</b> | <b>Late TLR (+)</b><br><b>(N=23)</b> |
|---------------------------------------|---------------------------------------|--------------------------------------|
| <b>Ischemic driven TLR, n (%)</b>     | 9 (15.5)                              | 7 (30.4)                             |
| <b>Angiographic driven TLR, n (%)</b> | 49 (84.5)                             | 16 (69.6)                            |

TLR, target lesion revascularization.

**Supplementary Table 6. TLR method**

|                                | <b>Early TLR (+)</b><br><b>(N=58)</b> | <b>Late TLR (+)</b><br><b>(N=23)</b> |
|--------------------------------|---------------------------------------|--------------------------------------|
| <b>POBA, n (%)</b>             | 30 (51.7)                             | 10 (43.5)                            |
| <b>DEB, n (%)</b>              | 20 (34.5)                             | 9 (39.1)                             |
| <b>DES, n (%)</b>              | 8 (13.8)                              | 4 (17.4)                             |
| - Same type of DES, n (%)      | 2 (3.4)                               | 2 (8.7)                              |
| - Different type of DES, n (%) | 6 (10.3)                              | 2 (8.7)                              |

TLR, target lesion revascularization; POBA, plain Old Balloon Angioplasty; DEB, drug eluting balloon; DES, drug eluting stent.

**Supplementary Figure 1. Cumulative probability curve of MLD (post procedure, first angiographic follow-up, second angiographic follow-up)**

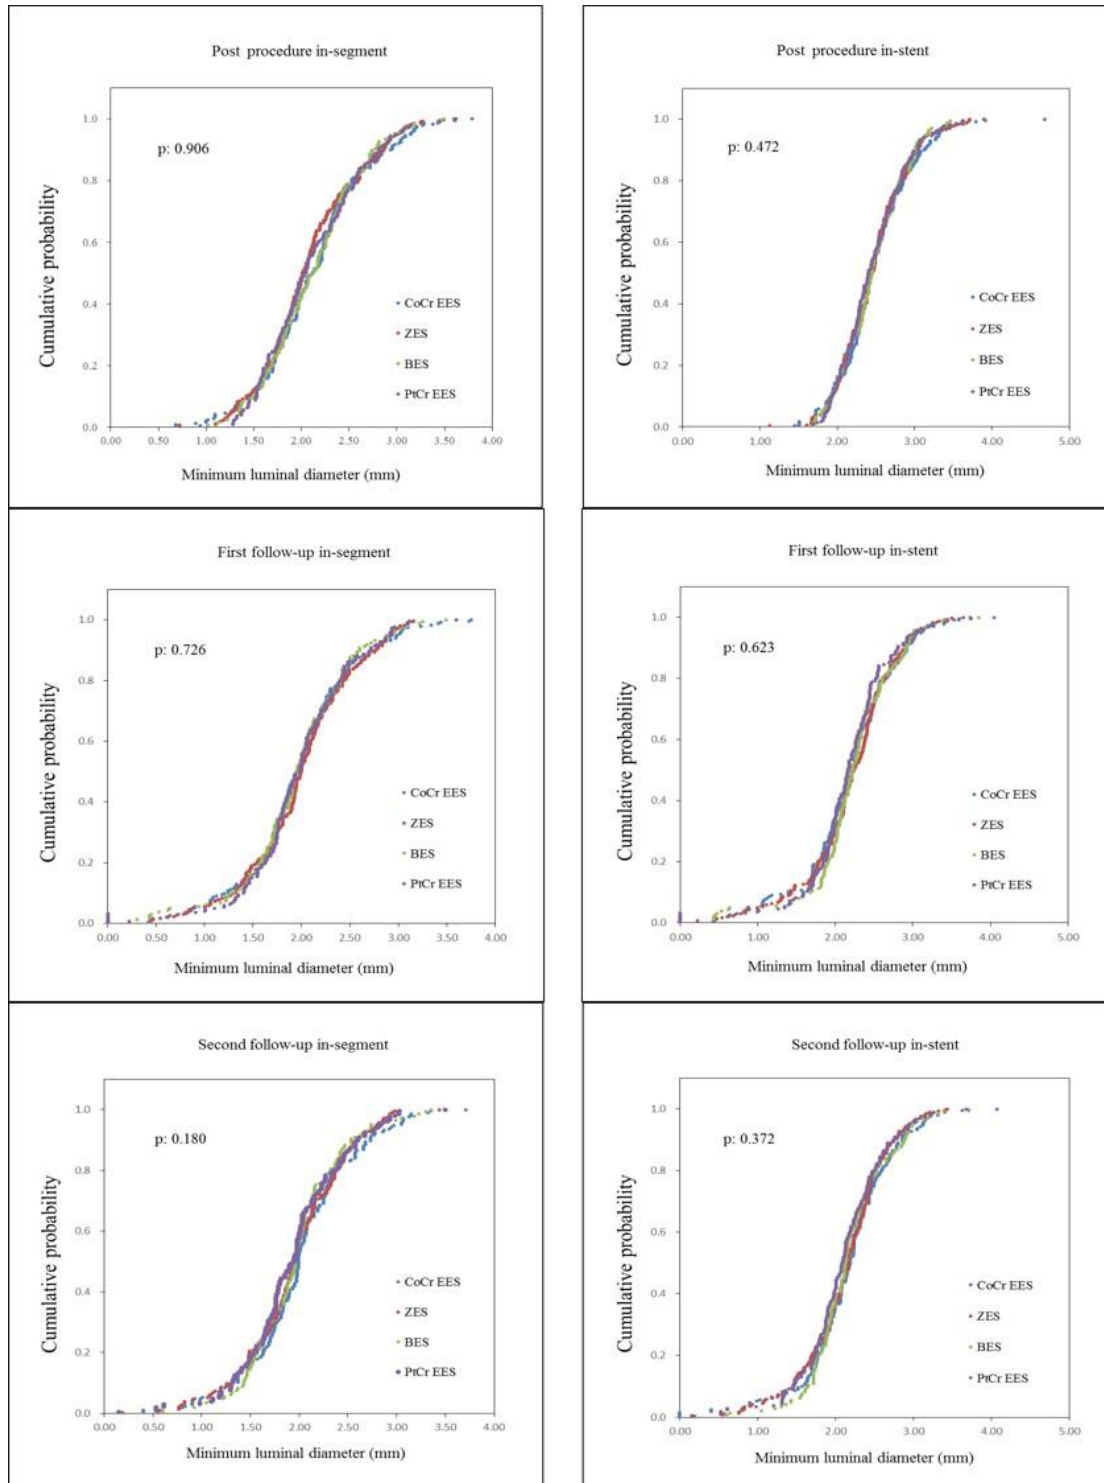

Supplement: 3270132.f1.pdf [file 3270132.f1.pdf]
